# Supplementary material
Source: publisher figshare collection journal article supplement (https://acs.figshare.com/ndownloader/files/3741397)

## Supporting Information for Publication

### **Quantification of *Borrelia burgdorferi* membrane proteins in human serum is a new concept for detection of bacterial infection**

Crystal S. F. Cheung<sup>‡#</sup>, Kyle W. Anderson<sup>‡#</sup>, Kenia Y. Villatoro Benitez<sup>#</sup>, Mark J. Soloski<sup>¶</sup>, John N. Aucott<sup>¶</sup>, Karen W. Phinney<sup>‡</sup>, and Illarion V. Turko<sup>‡#,\*</sup>

<sup>‡</sup>Biomolecular Measurement Division, National Institute of Standards and Technology, Gaithersburg, Maryland 20899, United States

<sup>#</sup>Institute for Bioscience and Biotechnology Research, Rockville, Maryland 20850, United States

<sup>¶</sup>Department of Medicine, Johns Hopkins School of Medicine, Baltimore, Maryland 21224, United States

---

#### **Table of Contents (Supporting Information)**

Table S1. **Donors of control and Lyme disease serum**

Table S2. **Identification of proteins in silver-stained gel spots numbered in Figure 1**

Figure S1. **Design of a QconCAT**

Figure S2. **Characterization of <sup>15</sup>N-labeled QconCAT**

Figure S3. **Two-dimensional PAGE pattern of *B. burgdorferi* membrane proteins before and after 0.1 mol/L Na<sub>2</sub>CO<sub>3</sub> wash**

**Table S1. Donors of control and Lyme disease serum.** Serum samples from donors with Lyme disease were collected on their 1<sup>st</sup> visit and on their 3<sup>rd</sup> visit two months later.

| Patient (#) | Age (y) | Gender | Lyme disease |
|-------------|---------|--------|--------------|
| 1           | 47      | F      | yes          |
| 2           | 61      | M      | yes          |
| 3           | 23      | M      | yes          |
| 4           | 62      | M      | no           |
| 5           | 31      | F      | no           |
| 6           | 24      | F      | no           |

**Table S2. Identification of proteins in silver-stained gel spots numbered in Figure 1**

| Spot and protein <sup>a</sup>                        | Mass (kDa) | pI   | Sequence coverage (%) | Score <sup>b</sup> |
|------------------------------------------------------|------------|------|-----------------------|--------------------|
| 1. integral outer membrane protein P66 (H7C7N8)      | 68.1       | 6.04 | 61                    | 461(76)            |
| 2. aminopeptidase 1 (P0C925)                         | 51.5       | 5.77 | 70                    | 540(76)            |
| 3. basic membrane protein A (Q45010)                 | 36.9       | 5.17 | 83                    | 553(76)            |
| 4. outer surface protein A (P0CL66)                  | 29.4       | 8.77 | 73                    | 347(76)            |
| 5. chaperone protein Dnak (P0C922)                   | 69.2       | 5.17 | 57                    | 685(76)            |
| 6. 60 kDa chaperonin (P0C923)                        | 58.9       | 5.18 | 69                    | 609(76)            |
| 7. enolase (O51312)                                  | 47.3       | 5.38 | 59                    | 337(76)            |
| 8. glyceraldehyde 3-phosphate dehydrogenase (P46795) | 36.2       | 7.74 | 78                    | 434(76)            |

<sup>a</sup>The number in parenthesis is a UniProtKB entry identifier.

<sup>b</sup>MOWSE score from Mascot software

([http://www.matrixscience.com/search\\_form\\_select.html](http://www.matrixscience.com/search_form_select.html)). The number in parenthesis is the score at which statistical significance ( $p < 0.05$ ) occurred for that particular search.

**Figure S1.** Design of a QconCAT. Selected tryptic peptide sequences (in *red*) with their natural 6 mer flanking sequences (in *black*) are shown for 7 *B. burgdorferi* proteins. These sequences were arranged in QconCAT in the following order: ospC-apeA-hup-bmpA-p66-fla. Additional sequences at the N- and C-terminus are shown in *green*.

ospC

VLLAVKEVEALLSSIDEIAAKAIGKKIVVLAVKEVETLLASIDELAKAIGKKIKAIGKKIGNNGLEAN  
QSKNTSLLSVLLAVKEVEALLSSIDELAKAIGKKI

apeA

IQRNKKSDIVEGENLKILIGSLPIETKEKNKVK

ospA

KNKDGKYDLIATVDKLELKGTAKEVLKG<sup>YV</sup>LEGTLTAEKTTLVVKAKEVLK<sup>SY</sup>VLEGTLTAEK  
TLVVKTTLVVKEGTVTL<sup>SK</sup>NISKSGKGTSDKNNGSGTLEGEKTDKSKVKLTIAD<sup>DL</sup>SQTKFEIF  
KEGKTTLV<sup>TE</sup>GT<sup>VV</sup>LS<sup>SK</sup>NILKSGNWDSKSSTLTISVNSQKTKNLVFTITVQKYDSAGTNLEGK  
AVEITT

hup

RPKVTKSDIVDQISLN<sup>IK</sup>NNNLKLGR<sup>LN</sup>ARNPQTGEYVKVLDHHVAYFRPGKDLKERV

bmpA

VGMTFRAQEGAFLTG<sup>YIA</sup>ARLSKTGKT<sup>GD</sup>VGRALNIFT<sup>SN</sup>HLKTNTFEG

p66

PMTGFKSTYYGFPSNDRAVRGTIGYKLPKLDLTFAIGGTGTGNRNQENDK  
TWKPIKNLLDQ<sup>NED</sup>TKSVIAET

fla

AINASRNNGINAANLSKTQEKL<sup>SM</sup>ISDQ<sup>RA</sup>NLGA<sup>FQ</sup>NRLESIKD

QconCAT (ospC-apeA-ospA-hup-bmpA-p66-fla)

MEVLLAVKEVEALLSSIDEIAAKAIGKKIVVLAVKEVETLLASIDELAKAIGKKIKAIGKKIGNNGLE  
ANQSKNTSLLSVLLAVKEVEALLSSIDELAKAIGKKIQRNKKSDIVEGENLKILIGSLPIETKEKN  
KVKNKDGKYDLIATVDKLELKGTAKEVLKG<sup>YV</sup>LEGTLTAEKTTLVVKAKEVLK<sup>SY</sup>VLEGTLTAE  
KTTLVVKTTLVVKEGTVTL<sup>SK</sup>NISKSGKGTSDKNNGSGTLEGEKTDKSKVKLTIAD<sup>DL</sup>SQTKFE  
IFKEGKTTLV<sup>TE</sup>GT<sup>VV</sup>LS<sup>SK</sup>NILKSGNWDSKSSTLTISVNSQKTKNLVFTITVQKYDSAGTNLEG  
KAVEITTRPKVTKSDIVDQISLN<sup>IK</sup>NNNLKLGR<sup>LN</sup>ARNPQTGEYVKVLDHHVAYFRPGKDLKER  
VGMTFRAQEGAFLTG<sup>YIA</sup>ARLSKTGKT<sup>GD</sup>VGRALNIFT<sup>SN</sup>HLKTNTFEGPMTGFKSTYYGFPS  
NDRAVRGTIGYKLPKLDLTFAIGGTGTGNRNQENDKTWKPIKNLLDQ<sup>NED</sup>TKSVIAETA<sup>IN</sup>ASR  
NNGINAANLSKTQEKL<sup>SM</sup>ISDQ<sup>RA</sup>NLGA<sup>FQ</sup>NRLESIKDKLAAALEHHHHHHH

Number of amino acids: 570

Molecular weight: 62082.4, Theoretical pI: 9.60

Instability index: The instability index (II) is computed to be 9.79

This classifies the protein as stable.

Grand average of hydropathicity (GRAVY): -0.39

**Figure S2.** Characterization of  $^{15}\text{N}$ -labeled QconCAT. *A*, 8.5% SDS-PAGE of purified QconCAT with molecular weight standards on the *left*. *B*, Linear mode MALDI spectrum of purified QconCAT. The measured  $m/z$   $[\text{M} + \text{H}]^+$  value was 62,094.2. This matches well with the expected  $m/z$   $[\text{M} + \text{H}]^+$  value of 62,083.4 and confirms expression and purification of the full-length QconCAT. *C*, The isotope incorporation was determined at the peptide level after digestion of the purified QconCAT with trypsin. A MALDI spectrum of representative peptide is shown. MALDI spectra of three peptides were imported to Isotopic Enrichment Calculator (<http://www.nist.gov/mml/bmd/bioanalytical/isoenrichcalc.cfm>) and the mean value was higher than 99% of  $^{15}\text{N}$  incorporation. This was accepted as a complete labeling and no correction was applied to the data.

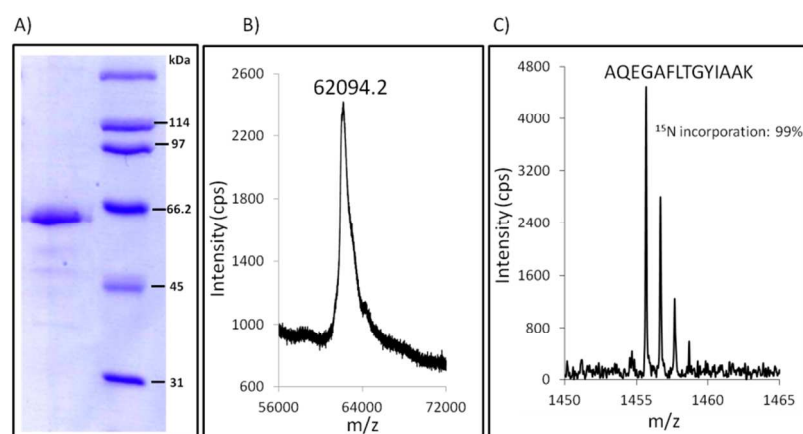

**Figure S3.** Two-dimensional PAGE pattern of *B. burgdorferi* membrane proteins before (A) and after (B) 0.1 mol/L Na<sub>2</sub>CO<sub>3</sub> wash. The first and second dimensions were performed on 7-cm pH 3-10 immobilized pH gradient strips and 8-16% mini-PROTEAN TGX gels, respectively. After separation, proteins were detected by silver staining. The proteins identified in the numbered spots are: integral outer membrane protein P66 (#1), aminopeptidase 1 (#2), basic membrane protein A (#3), outer surface protein A (#4).

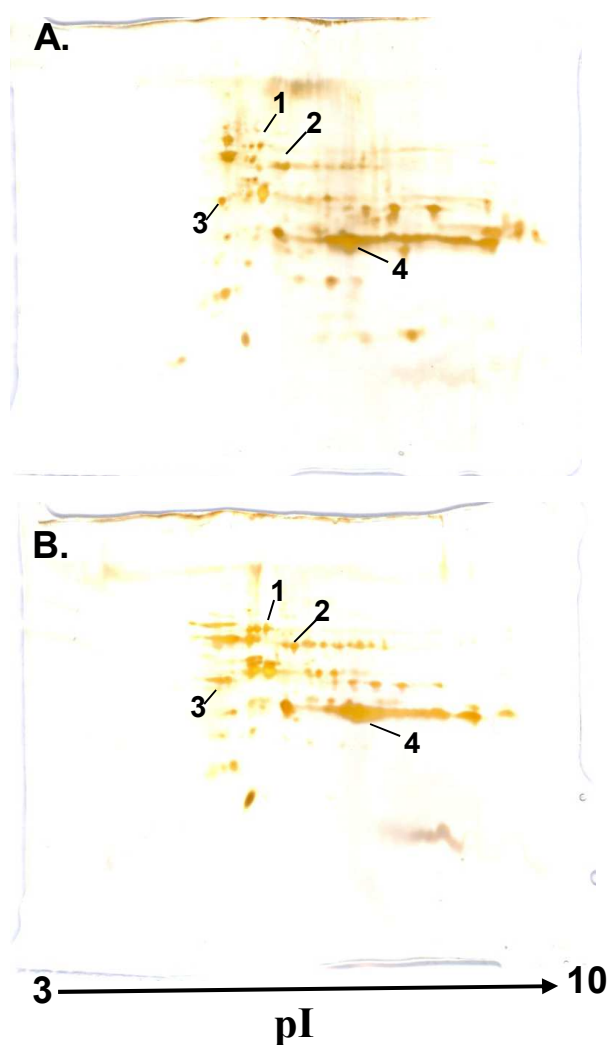

Supplement: Supplementary file 1 [file 3741397]
